# Supplementary material for: Nanopillar templating of biopolymer hydrogels augments stiffness and strength
Source: Research Square preprint supplement (doi:10.21203/rs.3.rs-583918/v1), 2021-06-04
Supplement: Supplementary file 1 [file 3ae274429e35532c7c823cd5.docx]

**Supplementary Information**

**Nanopillar templating of biopolymer hydrogels augments stiffness and strength**

Authors: Sara Heedy1, Juviarelli Pineda2, Albert Yee1*

1Department of Chemical and Biomolecular Engineering, University of California, Irvine

2Department of Materials Science and Engineering, University of California, Irvine

*** Corresponding author**

Email: afyee@uci.edu

***Methods***

***Preparation of chitosan solution***

A 1 w/v% or 1.1 w/v% chitosan solutions was prepared by dissolving chitosan powder (90% deacetylated, Qingdao Yunzhou Biochemistry Co., Ltd., China) in 0.1 M acetic acid while stirring at room temperature at 120 rpm.

***Fabrication of freestanding neutralized chitosan films***

A chitosan film was obtained by drop-casting 1 w/v% chitosan solution onto a flat or nanohole polyurethane mold. The chitosan solution was allowed to air dry and form a film. The film was then immersed in a 10 wt.% sodium hydroxide solution for 1 minute. The films were washed in deionized water to remove residual sodium hydroxide, and air-dried before removing from the mold.

***Fabrication of tripolyphosphate crosslinked chitosan films***

First, neutralized films were prepared. The films were immersed in 0.1 wt.% sodium tripolyphosphate (TPP) distilled water solution for 5 minutes. The films were washed in deionized water to remove residual TPP, and dried before removing from the mold.

***Fabrication of genipin crosslinked chitosan films***

The genipin crosslinked films were fabricated as previously described1. A stock crosslinker solution was prepared by dissolving genipin in ethanol. An appropriate volume of genipin in ethanol mixture was added to a 1.1 w/v% chitosan solution (10:1 chitosan to ethanol) to obtain a final concentration of 0.25 mM genipin and 1 w/v% chitosan solution. The solution was drop-cast onto flat or nanohole polyurethane mold and covered for 48 hours at room temperature before removing the cover and allowing the solvent to evaporate for 24 hours. The film and mold were then immersed into ethanol. Since excess genipin has a higher solubility in ethanol, this is assumed to stop the reaction. The films were dried before removing from the mold.

***Fabrication of freestanding alginate films***

A 1 w/v% sodium alginate solution was prepared by dissolving sodium alginate (Sigma-Aldrich, Milwaukee, WI) in water while stirring at room temperature at 120 rpm. A sodium alginate film was obtained by drop-casting the sodium alginate solution onto a flat or nanohole polyurethane mold and allowed to dry to form a film. The film was then immersed in a 0.4 M calcium chloride (Sigma-Aldrich, Milwaukee, WI) solution for 6 minutes to crosslink the material. The films were washed in deionized water to remove residual calcium chloride. Films were allowed to dry a second time before removing from the mold.

***Nanohole mold preparation:*** A 10 wt.% polyurethane solution was prepared by dissolving thermoplastic polyurethane 72D (Covestro, Leverkusen, Germany) in dimethylformamide at 90 °C. The master molds were prepared as previously described2,3. The polyurethane molds were prepared as described in *Reference 38*. Briefly, the thermoplastic polyurethane solution was cast onto the prepared master molds or a flat polytetrafluoroethylene support. In both cases, the polyurethane coated master molds were annealed at 70 °C to evaporate residual solvent. A force of 1.0 klbf from a Tetrahedron 100 hot embosser top plate (Tetrahedron, San Diego, CA) was applied while the mold was heated to 130 °C for 5 minutes. The mold was cooled to room temperature while the pressure was maintained for 5 minutes. The polyurethane mold was then removed from the master mold.

***Characterization***

***Scanning electron microscopy* *of the films*:** For characterization of the nanoscale and microscale structures in the hydrogels, samples were immersed in deionized water for 24 hours prior to freeze-drying using a VirTis BenchTop Pro freeze-dryer (SP Industries, Warminster, PA). The films were affixed to SEM stubs using conductive carbon tape and then sputter coated with 4 nm of iridium using an ACE 600 sputter coater (Leica Microsystems, Buffalo Grove, IL). Samples were imaged using a FEI Magellan 400 XHR Scanning Electron Microscope (FEI Company, Hillsboro, OR). Secondary electron images were acquired using an Immersion lens and Through the Lens (TLD) detector typically with a voltage of 3 kV and a dwell time of 10.0 µs. Data collection and analysis was carried out using xT microscope control version 5.0.2.2666 build 2666.

***Water content:*** The water content was measured by comparing the weight before and after hydration. As-prepared films were cut into 8 mm disks with a surgical punch. The films were weighed before (md) and after immersion in deionized water for 24 hours (mw). The water content is calculated as:

***Preparation of films for uniaxial tensile testing:*** The hydrogels were cut into strips 20 mm in length using a scalpel. The sample thickness was measured manually with a micrometer that had precision to 0.01 mm. Test-ready samples were 2.0 ± 0.1 mm wide with a gauge length of 10.0 ± 0.1 mm. To protect the ends of the films from being crushed by the tensile test grips and facilitate better force transfer to the specimen, the ends were sandwiched between sandpaper (1200 grit) with double-sided adhesive tape (1.0 mm x 3.0 mm strip). The dehydrated films were allowed to equilibrate at room temperature and humidity (20 ºC and 50% RH, respectively), while the hydrated films were immersed in deionized water for 24 hours prior to the experiment.

***Uniaxial tensile testing of the chitosan films:*** Uniaxial tensile testing was performed with a Test Resources testing system equipped with a 200-N capacity load cell (Test Resources, Sharkopee MN). The films were strained at a rate of 0.3 mm min-1 with a sampling rate of 30 Hz until fracture. Data was collected with TestBuilder V5.10.3. For the hysteresis experiments, films were loaded to a set strain before unloading. The films rest for 30 minutes before second loading and unloading cycle.

***Uniaxial tensile testing data analysis:*** The mechanical properties were obtained using a custom MATLAB script. The Modulus *E* and the tangent modulus *E*tangent were calculated from fitting to the linear regions of the stress-strain curve. The work at break, Wb (J m-3) was evaluated from the area below the stress-strain curve up to the point of fracture.

***X-Ray Diffraction measurements:*** X-Ray diffraction measurements were performed on as-prepared films placed on a zero-background sample holder. A Rigaku XRD was used with the Cu K- line, with a range of 5-30 °, scan rate 0.5 ° min-1, and step size of 0.07 °. Data were collected with SmartLab Guidance version 1.5.9.1 (Rigaku Corporation, Tokyo, Japan). Data analysis was performed using PDXL 2 Version 2.8.4.0 (Rigaku Corporation, Tokyo, Japan).

***Atomic force microscopy measurements of the chitosan hydrogel films:*** The nanoscale morphology of the films were characterized with atomic force microscopy (AFM). To prepare for AFM, the specimen films were adhered to glass slides (1 cm x 1 cm) with double sided tape before using an Arrow NCR cantilever with a reflective aluminum coating (NanoAndMore USA, Watsonville, CA). The cantilevers have a typical tip radius of < 10 nm, resonance frequency of 285 kHz, and spring constant 42 N m-1. AFM images were acquired with a Tosca 400 AFM with firmware 1.8.55 (Anton Paar, Graz, Austria) at a rate of 1.0 line s-1. Data collection was carried out with ToscaControl version 1.8.104.29754. For each strain, we analyzed 9 micrographs from 3 regions in 3 films.

***Atomic force microscopy image processing:*** The AFM micrographs were loaded into Gwyddion for all subsequent analysis of images4. All of the AFM images were first flattened before application of a threshold on the nanopillar tips using a watershed threshold (~56 px2). The images were flattened by removing a fourth-degree polynomial background to the unmasked region. The minimum value was shifted to zero.

***Height analysis:***After processing the AFM images, the watershed threshold was reapplied. The selection was justified as proper if it met the following criteria: (1) objects that were >50% out of the micrograph were removed; (2) objects that were between pillar edges were removed; and (3) unaffected by neighboring objects. The distribution within the masked areas was selected and export.

***Periodicity analysis:*** For analysis of the periodicity of the nanopillar topography, a 3 pixel Gaussian filter was applied to smooth the image. A two-dimensional fast Fourier transform (2D-FFT) filter was applied to the smoothed AFM image using Gwyddion4. A line profile was drawn in the 2D-FFT image to measure the periodicity parallel and perpendicular to the tensile direction. The line profile peaks were fit with a Lorentzian and deemed acceptable if the 2 < 0.1.

***Statistical analysis:*** Samples for each hydrogel film were examined. Data analysis was conducted in R and figures were produced using the package ggplot25,6. Differences were considered significant if p < 0.05.

***Supplementary Figures***

***Chitosan nanofibers***

**Supplementary Figure 1.** Histograms of chitosan nanofibril dimensions (a) Histogram of chitosan nanofibrils length. The mean fibril length is 1.4 ± 0.8 µm, and is marked by the red line. (d) Histogram of chitosan nanofibril diameter. The mean fibril diameter is 58.8 ± 10.8 nm, and is marked by the red line.

The obtained dimensions of the chitosan nanofibrils are similar to previous literature values for chitosan nanofibrils prepared in a similar manner7,8.

**Supplementary Figure 2.** Nanoscale morphology of the freeze-dried films as measured by AFM.

The surface morphology of the films is consistent with the SEM images in Figure 1. The nanopillars of the P200 film are seen to bunch together into clumps. The lower number of fibrils possible in the small diameter nanopillars likely reduced their flexural modulus, and clustering was probably caused by the capillary action of the relatively slender nanopillars9. The P300 and P500 film demonstrate the stabilized nanopillars without collapse and bunching due to the larger diameter which can accommodate more fibrils inside of the nanopillar.

***Mechanical tests of hydrated nanopillar templated hydrogels***

**Supplementary Figure 3.** Geometry of tensile test sample. (a) The films were cut into strips with a gauge length of 10.0 ± 0.1 mm, width of 2.0 ± 0.1 mm, and thickness of 20 µm – 100 µm.

**Supplementary Figure 4.** Additional mechanical properties of the hydrated chitosan films. (a) The transition strain, , of the hydrated films. (a) The maximum strain, , of the hydrated films. Each data set represents n=6 films.

The transition strain, , the strain at the onset of non-linear deformation that signifies when *E* becomes *E*tangent, was found to be independent of the nanopillar surface topography, suggesting that the underlying, non-linear mechanism was similar for all the films.

***AFM results***

**Supplementary Figure 5.** Example of the AFM image analysis process to extract height and diameter of nanostructure topography. Shown is the P500 film at 0% strain. (a) Representative AFM micrograph of unstrained P500 film. (b) The nanopillar tip is selected by isolating the region with the grain watershed feature. Each selected region is analyzed individually. (c) The corresponding nanopillar height distribution from the AFM image. (d) The corresponding nanopillar diameter distribution from the AFM image. The AFM scale bars are 500 nm.

***Mechanical tests of as-prepared nanopillar templated films***

**Supplementary Figure 6.** Summary of the as-prepared (dry) chitosan film mechanical properties. (a) Representative stress-strain curves of the dry as-prepared chitosan films. (b) The modulus *E* of the as-prepared films. (c) The ultimate tensile strength of the as-prepared films. (d) The yield strength of the as-prepared films. The experiments were performed at room temperature in air. Data are from n=6 films.

The mechanical properties of the dry as-prepared chitosan films are dependent on the nanopillar topography, in the order: P500 > P300 > P200 > Flat. The Young’s modulus *E*, ultimate tensile strength, and yield strength depend strongly on the specific nanopillar topography applied to the film surface. The enhanced properties indicate that rigid, sacrificial bonds have formed within the film prior to swelling in water.

***Generality of strategy applied to additional fiber forming systems***

**Supplementary Figure 7.** Example SEM image of the P300 surface of a chitosan-genipin crosslinked film. (a) A tear in the film surface layer of the film exposes the fibrous sub-surface layer. (b) A zoomed-in picture of the tear that shows the hierarchical bundling of the chitosan-genipin crosslinked fibers. The fibrous surface layer is exposed beneath the surface tear.

**Supplementary Figure 8.** Scanning electron micrographs of alginate films before and after hydration in water. (a) The as-prepared flat alginate film has a densified surface morphology as the pores have collapsed during the drying procedure. (b) The as-prepared P500 alginate film shows a good replication of nanostructures across the sample surface. A few of the nanostructure tips display a fibrous structure. (c) Freeze-dried flat alginate film after hydration in water for 24 hours. The freeze drying step preserves the porous fibrous morphology (d) Freeze-dried P500 film surface after hydration in water for 24 hours. The nanostructures have mostly relaxed into the surface, few regions of nanostructures remain between tufts of fibers. Images taken with a 30º tilt.

**Supplementary Figure 9.** Representative X-ray diffraction peaks of as-prepared Ca-alginate films.

The flat Ca-alginate film has relatively broad diffraction peaks, which suggests low crystallinity. The P500 Ca-alginate film has sharper diffraction peaks, which corresponds to more crystalline domains within the films. Both the flat and P500 Ca-alginate film show diffraction scattering at 2θ ~ 13° corresponds to the lateral packing between the chains10. Only the P500 Ca-alginate film shows scattering at 2θ ~ 23° corresponding to the chain inter-layer spacing. This shows that the as-prepared P500 Ca-alginate film has enhanced interactions in comparison to the flat film.

**Supplementary Figure 10.** Mechanical properties of as-prepared Ca-alginate films. (a) Representative stress-strain curve of the as-prepared flat and P500 Ca-alginate films. (b) The Young’s moduli *E* of the Ca-alginate films. The *E* increases with the addition of the P500 nanopillar topography. Data is from n=6 individual tests.

Prior to immersion in water, the alginate films with the nanostructure surface demonstrate good replication of the nanostructures. The stress-strain curves of the as-prepared film show that the nanostructure film is more stiff, due to the larger number of crosslinks enabled by the nanostructure surface. After hydration, the templated fibrous layers disappear.

***Supplementary Tables***

**Supplementary Table 1.** Dimensions of as-prepared nanopillar films.

| Structure | Period, P (nm) | Height, h (nm) | Diameter, d (nm) | Aspect ratio  (η = h d-1) |
| --- | --- | --- | --- | --- |
| P200 | 175 | 280 | 140 | 2 |
| P300 | 300 | 270 | 150 | 1.8 |
| P500 | 500 | 500 | 280 | 1.8 |

The structures of both the P200 and P300 are similar in dimensions. The structure of the P300 film is reduced in comparison to the master mold dimensions, likely because of incomplete infiltration into the nanohole during fabrication. We did not consider the incomplete infiltration to be an undesirable result, because the fabrication was repeatable.

**Supplementary Table 2.** Comparison of chitosan hydrogels prepared by neutralization method.

| **Literature Reference** | **content** | **Modulus** | **Strength** | **elongation** | **Water content** |
| --- | --- | --- | --- | --- | --- |
| This work | 1% | 7.9 - 20.7 MPa | 8.2 - 36.8 MPa | 48 - 65% | 50 - 70% |
| Wang, Yanjie, Sijun Liu, and Wei Yu. “Bioinspired Anisotropic Chitosan Hybrid Hydrogel.” ACS Applied Bio Materials 3, no. 10 (October 19, 2020): 6959–66. | NA | 218.2 MPa | 0.2 - 25.6 MPa | 22 - 495% | 60 - 72% |
| Zhu, Kunkun, Jiangjiang Duan, Jinhua Guo, Shuangquan Wu, Ang Lu, and Lina Zhang. “High-Strength Films Consisted of Oriented Chitosan Nanofibers for Guiding Cell Growth.” *Biomacromolecules* 18, no. 12 (December 11, 2017): 3904–12. | 4% | 1.3 - 4.3 MPa | 0.8 - 1.45 MPa | 31 - 38% | 90-93% |
| He, Qing He, Qiang Ao, Yandao Gong, and Xiufang Zhang. “Preparation of Chitosan Films Using Different Neutralizing Solutions to Improve Endothelial Cell Compatibility.” *Journal of Materials Science: Materials in Medicine* 22, no. 12 (December 2011): 2791–2802. | 2% | 1.42 - 12.86 MPa | 0.62 - 2.73 MPa | 41 - 68% | 70 - 190% |
| C. Caner, P. J. Vergano, and J. L. Wiles. “Chitosan Film Mechanical and Permeation Properties as Affected by Acid, Plasticizer, and Storage.” *Journal of Food Science* 63, no. 6 (2006): 1049–53. | 3% | NA | 22.2 MPa | 32% | NA |
| Jingyi Nie, Zhengke Wang, and Qiaoling Hu. “Difference between Chitosan Hydrogels via Alkaline and Acidic Solvent Systems.” *Scientific Reports* 6, no. 1 (December 2016): 36053. | 2-3% | NA | NA | NA | NA |
| Chang, Wei, Fei Liu, Hafiz Rizwan Sharif, Zhengnong Huang, H.Douglas Goff, and Fang Zhong. “Preparation of Chitosan Films by Neutralization for Improving Their Preservation Effects on Chilled Meat.” *Food Hydrocolloids* 90 (May 2019): 50–61. | 1% | NA | 65.5 - 104.0 MPa | 2.6 - 3.2% | NA |

**Supplementary Table 3.** Summary of the mechanical properties of the hydrated chitosan films.

| **Structure** | **Thickness (µm)** | **E (MPa)** | **Etangent (MPa)** | **(MPa)** | **Wb (MJ m-3)** | **(%)** | **(%)** | **Water content (%)** |
| --- | --- | --- | --- | --- | --- | --- | --- | --- |
| Flat | 55.5 ± 2.74 | 7.9 ± 2.4 | 32.4 ± 8.7 | 8.22 ± 3.7 | 1.5 ± 1.1 | 48.2 ± 18.4 | 32 ± 7.3 | 59.3 ± 5.2 |
| P200 | 39.8 ± 2.14 | 12.3 ± 0.7 | 36.5 ± 4.4 | 14.3 ± 4.3 | 3.9 ± 1.8 | 65.0 ± 8.3 | 34.1 ± 11.8 | 63.9 ± 5.8 |
| P300 | 34.3 ± 1.21 | 12.9 ± 5.0 | 61.4 ± 10.5 | 25.7 ± 7.5 | 7.4 ± 3.9 | 82.2 ± 17.4 | 44.9 ± 12.6 | 68.6 ± 6.4 |
| P500 | 30.0 ± 1.41 | 20.7 ± 4.6 | 89.7 ± 11.6 | 36.8 ± 9.2 | 8.5 ± 3.2 | 64.5 ± 14.8 | 28.9 ± 9.5 | 67 ± 5.7 |

The parameters *E*, *E*tangent, , Wb, , and are Young’s modulus, tangent modulus, stress at break, work at break, maximum strain, and transition strain, respectively. Data are from n=6 individual tests. The values are the mean and standard deviation.

**Supplementary Table 4.** Comparison of nanopillar templated chitosan hydrogel to natural tissues.

| **Type** | **Modulus** | **Strength** | **Reference** |
| --- | --- | --- | --- |
| This work | 7.9 - 20.7 MPa | 8.2 - 36.8 MPa | This work |
| cartilage | 5 - 25 MPa | 0.8 - 25 MPa | Little, Christopher James, Nahshon Kenneth Bawolin, and Xiongbiao Chen. “Mechanical Properties of Natural Cartilage and Tissue-Engineered Constructs.” *Tissue Engineering Part B: Reviews* 17, no. 4 (August 2011): 213–27. |
| cartilage | 5 - 7 MPa | 0.8 - 25 MPa | Vladimir Roth and Van C. Mow. “The Intrinsic Tensile Behavior of the Matrix of Bovine Articular Carilage and Its Variation with Age.” *The Journal of Bone and Joint Surgery* 62, no. 7 (1980): 1102–17. |
| cartilage | 3 - 8 MPa | 8 - 10 MPa | Williamson, Amanda K., Albert C. Chen, Koichi Masuda, Eugene J.- M. A. Thonar, and Robert L. Sah. “Tensile Mechanical Properties of Bovine Articular Cartilage: Variations with Growth and Relationships to Collagen Network Components.” *Journal of Orthopaedic Research* 21, no. 5 (September 2003): 872–80. |
| cartilage | 20 MPa | 5 MPa | Thambyah, A., A. Nather, and J. Goh. “Mechanical Properties of Articular Cartilage Covered by the Meniscus.” *Osteoarthritis and Cartilage* 14, no. 6 (June 2006): 580–88. |
| cartilage | 8 - 20 MPa | 7 - 25 MPa | Eleswarapu, Sriram V., Donald J. Responte, and Kyriacos A. Athanasiou. “Tensile Properties, Collagen Content, and Crosslinks in Connective Tissues of the Immature Knee Joint.” Edited by Alejandro Almarza. *PLoS ONE* 6, no. 10 (October 13, 2011): e26178. |
| cartilage | 20 MPa | 40 MPa | Wegst, U. G. K., and M. F. Ashby. “The Mechanical Efficiency of Natural Materials.” *Philosophical Magazine* 84, no. 21 (July 21, 2004): 2167–86. |
| skin | 58 – 94 MPa | 12 - 25 MPa | Annaidh, A. Ní, M. Ottenio, K. Bruyère, M. Destrade, and M. D. Gilchrist. “Mechanical Properties of Excised Human Skin.” In *6th World Congress of Biomechanics (WCB 2010). August 1-6, 2010 Singapore*, edited by C. T. Lim and J. C. H. Goh, 31:1000–1003. IFMBE Proceedings. Berlin, Heidelberg: Springer Berlin Heidelberg, 2010. |
| skin | 48 - 82 MPa | 18 - 25 MPa | Wegst, U. G. K., and M. F. Ashby. “The Mechanical Efficiency of Natural Materials.” *Philosophical Magazine* 84, no. 21 (July 21, 2004): 2167–86. |
| skin | 19 - 44 MPa | 8 - 15 MPa | Swartz, S. M., M. S. Groves, H. D. Kim, and W. R. Walsh. “Mechanical Properties of Bat Wing Membrane Skin.” *Journal of Zoology* 239, no. 2 (June 1996): 357–78. |
| skin | 20 | 40 MPa | Joodaki, Hamed, and Matthew B Panzer. “Skin Mechanical Properties and Modeling: A Review.” *Proceedings of the Institution of Mechanical Engineers, Part H: Journal of Engineering in Medicine* 232, no. 4 (April 2018): 323–43. |
| ligament | 12 - 26 MPa | 9 - 20 MPa | Eleswarapu, Sriram V., Donald J. Responte, and Kyriacos A. Athanasiou. “Tensile Properties, Collagen Content, and Crosslinks in Connective Tissues of the Immature Knee Joint.” Edited by Alejandro Almarza. *PLoS ONE* 6, no. 10 (October 13, 2011): e26178. |
| ligament | 65 - 447 MPa | 13 - 46 MPa | Jung, Ho-Joong, Matthew B Fisher, and Savio L-Y Woo. “Role of Biomechanics in the Understanding of Normal, Injured, and Healing Ligaments and Tendons.” *BMC Sports Science, Medicine and Rehabilitation* 1, no. 1 (December 2009): 9. |

**Supplementary Table 5.** Comparison of nanopillar templated chitosan hydrogel to reported stiff and strong hydrogels.

| **Reference** | **Type** | **Bonding** | **Modulus** | **Strength** | **Water** |
| --- | --- | --- | --- | --- | --- |
| This work | Nanopillar templating | H-bond | 7.9 - 20.7 MPa | 8.2 - 36.8 MPa | 50 - 70% |
| Hu, Xiaobo, et al. “Weak Hydrogen Bonding Enables Hard, Strong, Tough, and Elastic Hydrogels.” ***Advanced Materials*** 27, no. 43 (November 2015): 6899–6905. | noncovalent | H-bond | 14 MPa | 1.3 MPa | 70% |
| Sun, Tao Lin, et al. “Physical Hydrogels Composed of Polyampholytes Demonstrate High Toughness and Viscoelasticity.” ***Nature Materials*** 12, no. 10 (2013): 932–37. | noncovalent | ionic | 8 MPa | 1.8 MPa | 50-70% |
| Wu, Shuwang, et al. “Poly(Vinyl Alcohol) Hydrogels with Broad‐Range Tunable Mechanical Properties via the Hofmeister Effect.” ***Advanced Materials*** 33, no. 11 (March 2021): 2007829. | salting out | H-bond | 2.5 MPa | 15 MPa | 85-95% |
| Hua, Mutian, et al. “Strong Tough Hydrogels via the Synergy of Freeze-Casting and Salting Out.” ***Nature*** 590, no. 7847 (February 25, 2021): 594–99. | directional freezing & salting out | H-bond | 0 - 2.5 MPa | 11.5 - 23.5 MPa | 70-95% |
| Gong, J.P., et al. “Double-Network Hydrogels with Extremely High Mechanical Strength.” ***Advanced Materials*** 15, no. 14 (July 17, 2003): 1155–58. | Double network | Physical | NA | 80 MPa | 60-90% |
| Sun, Jeong-Yun, et al. “Highly Stretchable and Tough Hydrogels.” ***Nature*** 489 (September 6, 2012): 133–36. | Double network | chemical & physical | 0.029 MPa | 0.159 MPa | 86% |
| Nakayama, A., A. et al. “High Mechanical Strength Double-Network Hydrogel with Bacterial Cellulose.” ***Advanced Functional Materials*** 14, no. 11 (November 2004): 1124–28. | double network | H-bond | 5 – 23 MPa | 1.1 – 3.8 MPa | 90% |
| Yang, Yanyu, et al. “A Universal Soaking Strategy to Convert Composite Hydrogels into Extremely Tough and Rapidly Recoverable Double‐Network Hydrogels.” ***Adv. Mater****.*, 2016, 7. | Double network | H-bond | 0.32 – 0.36 MPa | 1.94 – 2.12 MPa | NA |
| Wang, Yanjie, et al. “Bioinspired Anisotropic Chitosan Hybrid Hydrogel.” ***ACS Applied Bio Materials*** 3, no. 10 (October 19, 2020): 6959–66. | Mechanical stretching | H-bond | 218.2 MPa | 25.6 MPa | 70-72% |
| Ye, Dongdong, et al. “Robust Anisotropic Cellulose Hydrogels Fabricated via Strong Self-Aggregation Forces for Cardiomyocytes Unidirectional Growth.” ***Chemistry of Materials*** 30, no. 15 (August 14, 2018): 5175–83. | Mechanical stretching | H-bond | 0.2 - 37.9 MPa | 7.98 MPa | 85-90% |
| ﻿Mredha, Md Tariful Islam, et al. “A Facile Method to Fabricate Anisotropic Hydrogels with Perfectly Aligned Hierarchical Fibrous Structures.” ***Advanced Materials*** 30, no. 9 (2018): 1–8. | Mechanical stretching | H-bond & ionic | 203 MPa | 22.4 MPa | 57% |
| Xu, Duoduo, et al. “High-Flexibility, High-Toughness Double-Cross-Linked Chitin Hydrogels by Sequential Chemical and Physical Cross-Linkings.” ***Advanced Materials*** 28, no. 28 (July 2016): 5844–49. | dual-crosslink | chemical & physical | 0.22 MPa | 4 MPa | 90.30% |
| Zou, Jie, et al. “Highly Efficient and Environmentally Friendly Fabrication of Robust, Programmable, and Biocompatible Anisotropic, All‐Cellulose, Wrinkle‐Patterned Hydrogels for Cell Alignment.” ***Advanced Materials*** 31, no. 46 (November 2019): 1904762. | dual-crosslink | H-bond | 12.18 MPa | NA | NA |
| Li, Jianyu, et al. “Stiff, Strong, and Tough Hydrogels with Good Chemical Stability.” ***J. Mater. Chem.*** *B* 2, no. 39 (2014): 6708–13. | dual-crosslink | chemical & physical | 5 MPa | 2.5 MPa | 60-80% |
| Lin, Shaoting, et al. “Anti-Fatigue-Fracture Hydrogels.” ***Science Advances***, 2019, 10. | freeze-thawing | H-bond | 8 MPa | 8 MPa | 60% |

**Supplementary Table 6.** Periodicity, nanopillar height, mean diameter, and aspect ratio of the P300 and P500 film at increasing tensile strain after air-drying.

| **Structure** | **Tensile Strain (%)** | **Periodicity (nm)** | **Max. height, h (nm)** | **Mean diameter, d (nm)** | **Aspect ratio ( = h d-1)** |
| --- | --- | --- | --- | --- | --- |
| P300 | 0 | 205 ± 4 | 174 ± 60.4 | 166 ± 27 | 1.1 ± 0.5 |
| P300 | 10 | 222 ± 11.3 | 137 ± 43 | 169 ± 19.3 | 0.8 ± 0.3 |
| P300 | 20 | 252 ± 10.9 | 192 ± 62.6 | 148 ± 21.8 | 1.3 ± 0.5 |
| P300 | 30 | 282 ± 16.8 | 197 ± 60.8 | 171 ± 19.3 | 1.2 ± 0.4 |
| P300 | 40 | 349 ± 27.7 | 131 ± 34 | 177 ± 20.2 | 0.8 ± 0.2 |
| P300 | 50 | 358 ± 54.6 | 191 ± 23.1 | 135 ± 8.5 | 1.4 ± 0.2 |
| P300 | 60 | 440 ± 49.9 | 179 ± 37.5 | 173 ± 16.3 | 1 ± 0.2 |
| P500 | 0 | 460 ± 28.9 | 452 ± 39.6 | 261 ± 14.3 | 1.7 ± 0.2 |
| P500 | 10 | 513 ± 53.1 | 461 ± 23.4 | 275 ± 19.4 | 1.7 ± 0.1 |
| P500 | 20 | 532 ± 26.3 | 385 ± 115 | 301 ± 46.4 | 1.4 ± 0.5 |
| P500 | 30 | 595 ± 17.7 | 391 ± 139 | 312 ± 32.6 | 1.3 ± 0.5 |
| P500 | 40 | 664 ± 47.2 | 455 ± 69.8 | 312 ± 38.2 | 1.5 ± 0.3 |
| P500 | 50 | 667 ± 47.7 | 447 ± 51.1 | 305 ± 16.9 | 1.5 ± 0.2 |
| P500 | 60 | 835 ± 54 | 381 ± 87.7 | 324 ± 37.7 | 1.2 ± 0.4 |

The periodicity was quantified using 2-D FFT from n=9 film for each strain. The maximum height and mean diameter were quantified from the nanopillars within n=9 films for each strain. The values are the mean and standard deviation.

These values are from films that have been hydrated and air-dried; they are different from the pristine, virgin samples that were reported in Supplementary Table 1. The difference is due to the nanostructures hydrating and shrinking during the second drying cycle. In the P500 film the maximum height, *h*, linearly decreases and the mean diameter, *d*, nearly increases with the applied strain *ε*. In contrast, in the P300 film the change of *h* and *d* with *ε* did not follow a discernable trend. This could be due to the collapse of the P300 nanopillars during drying.

**Supplementary Table 7.** Summary of the as-prepared chitosan film mechanical properties

| **Structure** | **Thickness (µm)** | ***E* (GPa)** | **Yield Strength (MPa)** | **Ultimate Tensile Strength (MPa)** |
| --- | --- | --- | --- | --- |
| Flat | 22.7 ± 2.8 | 1.41 ± 0.3 | 25.6 ± 6.2 | 41.1 ± 8.6 |
| P200 | 20.9 ± 0.9 | 1.57 ± 0.2 | 32.9 ± 6.8 | 53.7 ± 14.8 |
| P300 | 20.8 ± 0.7 | 1.95 ± 0.2 | 39.0 ± 1.9 | 57.7 ± 15.8 |
| P500 | 20.7 ± 0.4 | 2.23 ± 0.1 | 43.6 ± 7.4 | 58.6 ± 10.2 |

Results are calculated from (n=6) for the thickness and mechanical properties. The parameter *E* is the Young’s modulus. The values are the mean and standard deviation.

**Supplementary Table 8.** Summary of the XRD peaks observed in the chitosan films.

| **Structure** | **2θ (°)** | **d (Å)** |
| --- | --- | --- |
| Flat | 9.8 | 9 |
| Flat | 15.3 | 5.8 |
| Flat | 21.3 | 4.2 |
| Flat | 23.8 | 3.7 |
| P500 | 9.9 | 8.9 |
| P500 | 15.1 | 5.9 |
| P500 | 21.1 | 4.2 |
| P500 | 23.4 | 3.8 |

We confirmed that the XRD measurements gave consistent values for the same kinds of samples.

The observed peak positions in XRD are consistent with those in the literature for chitosan. The and peaks are due to the crystalline (110) lattice, and the is typical of anhydrous chitosan11. The scattering diffraction at 2θ ~ 15° is representative of the anhydrous chitosan polymorph, with enhanced inter-chain hydrogen bonds11,12. This peak has been observed in chitosan systems after sodium hydroxide neutralization13, and its intensity is correlated to the strength of the inter-sheet interactions. The sharper diffraction peaks from the nanostructured P500 film show that the film contains a larger number of crystalline domains in comparison to the flat control film.

**References**

1. Heedy, S., Marshall, M., Pineda, J. J., Pearlman, E. & Yee, A. F. Synergistic Antimicrobial Activity of a Nanopillar Surface on a Chitosan Hydrogel. *ACS Applied Bio Materials* **3**, 8040–8048 (2020).

2. Rosenzweig, R. *et al.* Nanopillared Surfaces Disrupt Pseudomonas aeruginosa Mechanoresponsive Upstream Motility. *ACS Applied Materials and Interfaces* **11**, 10532–10539 (2019).

3. Dickson, M. N., Liang, E. I., Rodriguez, L. A., Vollereaux, N. & Yee, A. F. Nanopatterned polymer surfaces with bactericidal properties. *Biointerphases* **10**, 021010 (2015).

4. Nečas, D. & Klapetek, P. Gwyddion: an open-source software for SPM data analysis. *Open Physics* **10**, (2012).

5. *R Core Team*.

6. Wickham H. *ggplot2*. (2016).

7. Wijesena, R. N. *et al.* A method for top down preparation of chitosan nanoparticles and nanofibers. *Carbohydrate Polymers* **117**, 731–738 (2015).

8. Fadaie, M. & Mirzaei, E. Nanofibrillated chitosan/polycaprolactone bionanocomposite scaffold with improved tensile strength and cellular behavior. *Nanomed J* **5**, (2018).

9. Kang, S. H., Pokroy, B., Mahadevan, L. & Aizenberg, J. Control of shape and size of nanopillar assembly by adhesion-mediated elastocapillary interaction. *ACS Nano* **4**, 6323–6331 (2010).

10. Li, L., Fang, Y., Vreeker, R., Appelqvist, I. & Mendes, E. Reexamining the Egg-Box Model in Calcium−Alginate Gels with X-ray Diffraction. *Biomacromolecules* **8**, 464–468 (2007).

11. Baklagina, Y. G. *et al.* Polymorphic Modifications of Chitosan. *Crystallogr. Rep.* **63**, 303–313 (2018).

12. Kawada, J., Abe, Y., Yui, T., Okuyama, K. & Ogawa, K. Crystalline Transformation of Chitosan from Hydrated to Anhydrous Polymorph Via Chitosan Monocarboxylic Acid Salts. *Journal of Carbohydrate Chemistry* **18**, 559–571 (1999).

13. Chang, W. *et al.* Preparation of chitosan films by neutralization for improving their preservation effects on chilled meat. *Food Hydrocolloids* **90**, 50–61 (2019).
